# Supplementary material
Source: PubMed Central journal article supplement (PMC8720291)
Supplement: NIHMS1743156-supplement-Supp_materials_list.pdf [file NIHMS1743156-supplement-Supp_materials_list.pdf]

# A MRI-Based Toolbox for Neurosurgical Planning in Nonhuman Primates

William K.S. Ojemann<sup>1,2</sup>, Devon J. Griggs<sup>2,3</sup>, Zachary Ip<sup>1,2</sup>, Olivya Caballero<sup>4</sup>, Hesamoddin Jahanian<sup>5</sup>, Susana Martinez-Conde<sup>4</sup>, Stephen Macknik<sup>4</sup>, Azadeh Yazdan-Shahmorad<sup>1,2,3</sup>

<sup>1</sup>Bioengineering Department, University of Washington <sup>2</sup>Washington National Primate Research Center, University of Washington <sup>3</sup>Electrical and Computer Engineering Department, University of Washington <sup>4</sup>Department of Ophthalmology, SUNY Downstate Health Sciences University <sup>5</sup>Radiology Department, University of Washington

## Corresponding Author

Azadeh Yazdan-Shahmorad  
azadehy@uw.edu

## Citation

Ojemann, W.K., Griggs, D.J., Ip, Z., Caballero, O., Jahanian, H., Martinez-Conde, S., Macknik, S., Yazdan-Shahmorad, A. A MRI-Based Toolbox for Neurosurgical Planning in Nonhuman Primates. *J. Vis. Exp.* (), e61098, doi:10.3791/61098 (2020).

## Date Published

July 17, 2020

## DOI

10.3791/61098

## URL

jove.com/video/61098

## Materials

| Name                                        | Company                       | Catalog Number                        | Comments                                                   |
|---------------------------------------------|-------------------------------|---------------------------------------|------------------------------------------------------------|
| 3D Printing Software (GrabCAD Print)        | Stratasys                     | Version 1.36                          | Used for High quality 3D printing                          |
| 3D Printing Software (Simplify 3D)          | Simplify3D                    | Version 4.1                           | Used for PLA 3D printing                                   |
| Agarose                                     | Benchmark Scientific          | A1700                                 | Used for making gel brains                                 |
| Black Nail Polish                           | L.A. Colors                   | CNP637                                | Used for gel molding                                       |
| Cannula (ID 450 um, OD 666 um)              | Polymicro Technologies        | 1068150625                            | Used to inject dye into gel brain                          |
| Catheter Connector                          | B Braun                       | PCC2000                               | Perifix for 20-24 Gage epidural catheters; Units per Cs 50 |
| Dremel 3D Digilab 3D45 printer              | Dremel                        | F0133D45AA                            | Used for prototyping in PLA                                |
| ECOWORKS                                    | Stratasys                     | 300-00104                             | Used to dissolve QSR support structures                    |
| Erlmeyer flask                              | Pyrex                         | 4980                                  | Used for gel molding                                       |
| Ethyl cyanoacrylate                         | The Original Super Glue Corp. | 15187                                 | Used to make combined cannula                              |
| Graduated cylinder                          |                               | 3023                                  | Used for gel molding                                       |
| HATCHBOX PLA 3D Printer Filament            | HATCHBOX                      | 3DPLA-1KG1.75-RED/3DPLA-1KG1.75-BLACK | 1kg Spool, 1.75mm, Red/Black                               |
| Locust Bean Gum                             | Modernist Pantry              | 1018                                  | Gumming agent for gel brain mixtures                       |
| MATLAB                                      | MathWorks                     | R2019b                                | Used for skull extraction                                  |
| McCormick Yellow Food Color                 | McCormick                     |                                       | Used for dye injection                                     |
| Microwave                                   | Panasonic                     | NN-SD975S                             | Used for agarose curing                                    |
| MR Imaging Software (3D Slicer)             | 3D Slicer                     | Version 4.10.2                        | Used for 3D model generation                               |
| MR Imaging Software (Mango with BET plugin) | Reasearch Imaging Institute   | Version 4.1                           | Used for brain extraction                                  |
| Philips Acheiva MRI System                  | Philips                       | 4522 991 19391                        | Used to image non-human primates                           |
| Phosphate Buffered Solution                 | Gibco                         | 70011-044                             | 10X diluted with DI water to 1X                            |
| Pump                                        | WPI                           | UMP3T-1                               | Used for dye injection                                     |

|                            |                   |           |                                        |
|----------------------------|-------------------|-----------|----------------------------------------|
| Pump driver                | WPI               | UMP3T-1   | Used for dye injection                 |
| Refrigerator               | General Electric  |           | Used to preserve agarose gel           |
| Scientific Spatula         | VWR               | 82027-494 | Used to extract gel molds              |
| SolidWorks                 | Dassault Systemes | 2019      |                                        |
| Stratasys ABS-M30 filament | Stratasys         | 333-60304 | Used for high quality 3D printing      |
| Stratasys F170 3D printer  | Stratasys         | 123-10000 | Used for high quality 3D printing      |
| Stratasys QSR support      | Stratasys         | 333-63500 | Used to create supports with ABS model |
| Syringe                    | SGE               | SGE250TLL | Used for dye injection                 |
